# Supplementary material for: Fe-induced morphological transformation of 1-D CuO nanochains to porous nanofibers with enhanced optical, magnetic and ferroelectric properties
Source: Royal Society of Chemistry journal article supplement (doi:10.1039/c4tc02809k), 2015-01-01
Supplement: c4tc02809k1.pdf [file c4tc02809k1.pdf]

## Fe-induced morphological transformation of 1-D CuO nanochains to porous nanofibers with enhanced optical, magnetic and ferroelectric properties

Umesh Kumar Gaur, Anil Kumar and G.D.Varma

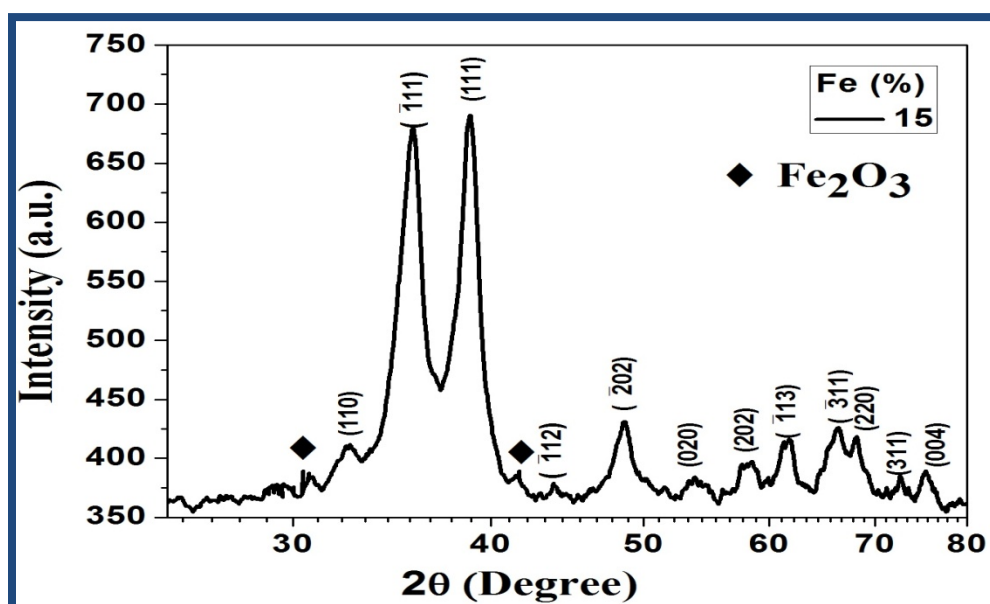

Fig. S1 XRD pattern of 15 % Fe doped CuO nanostructures

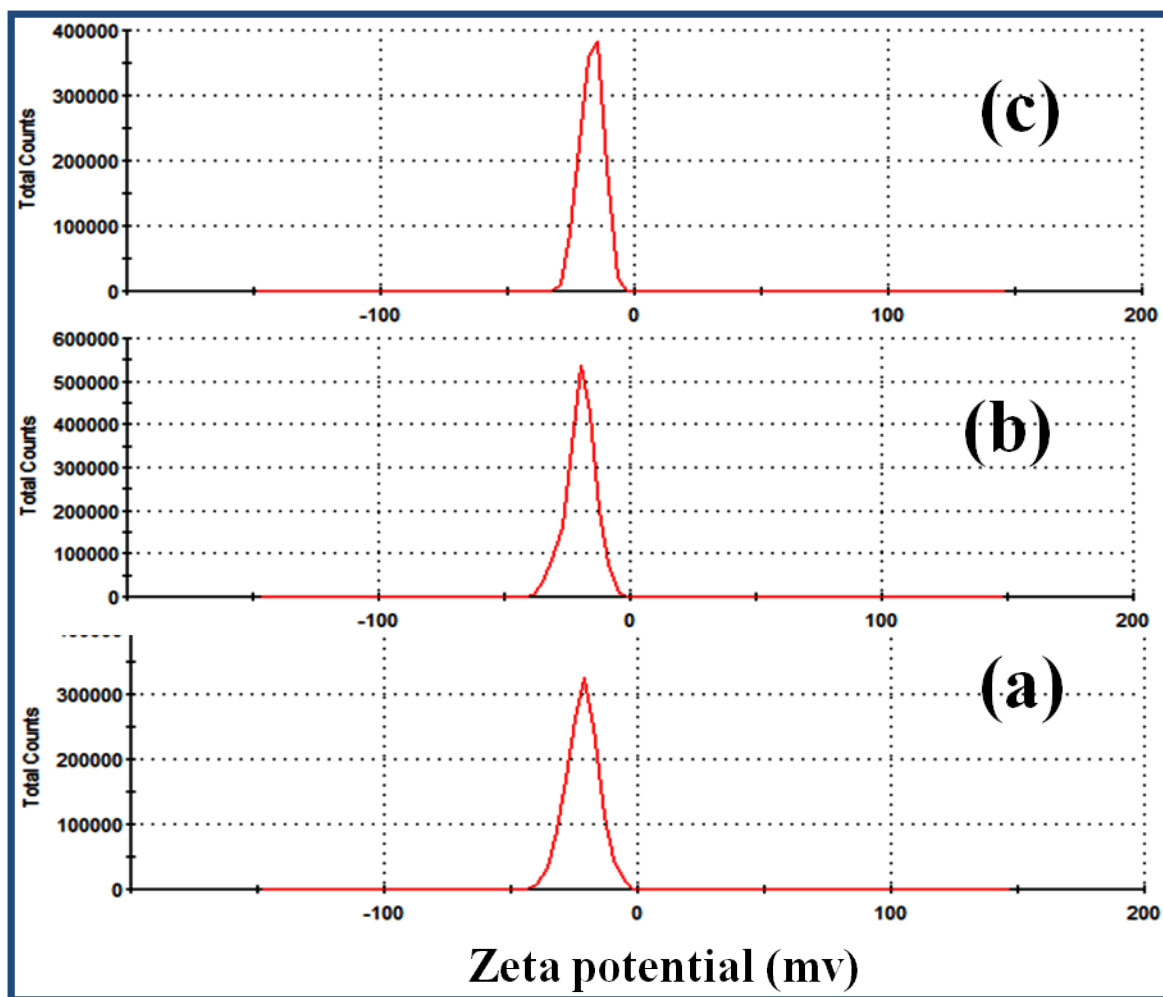

**Fig. S2** Zeta potential of (a) SP2, (b) SP5 and (c) SP10

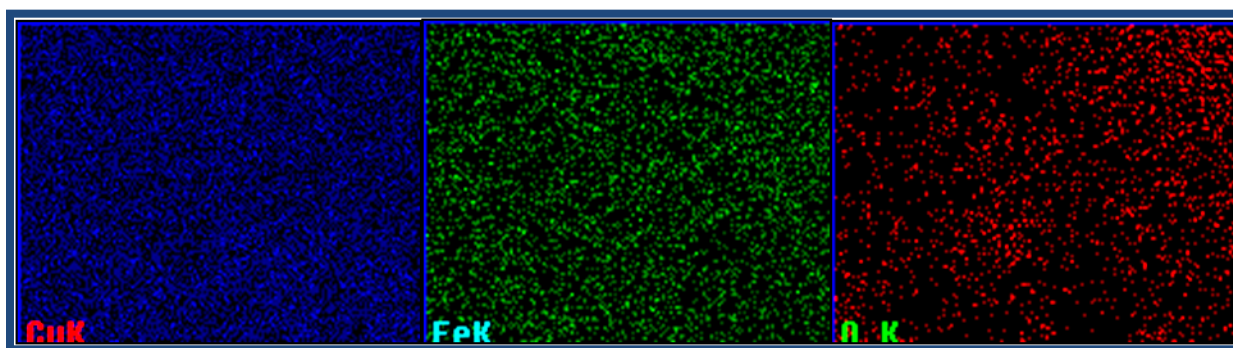

**Fig. S3** Elemental mapping of each element in SP10

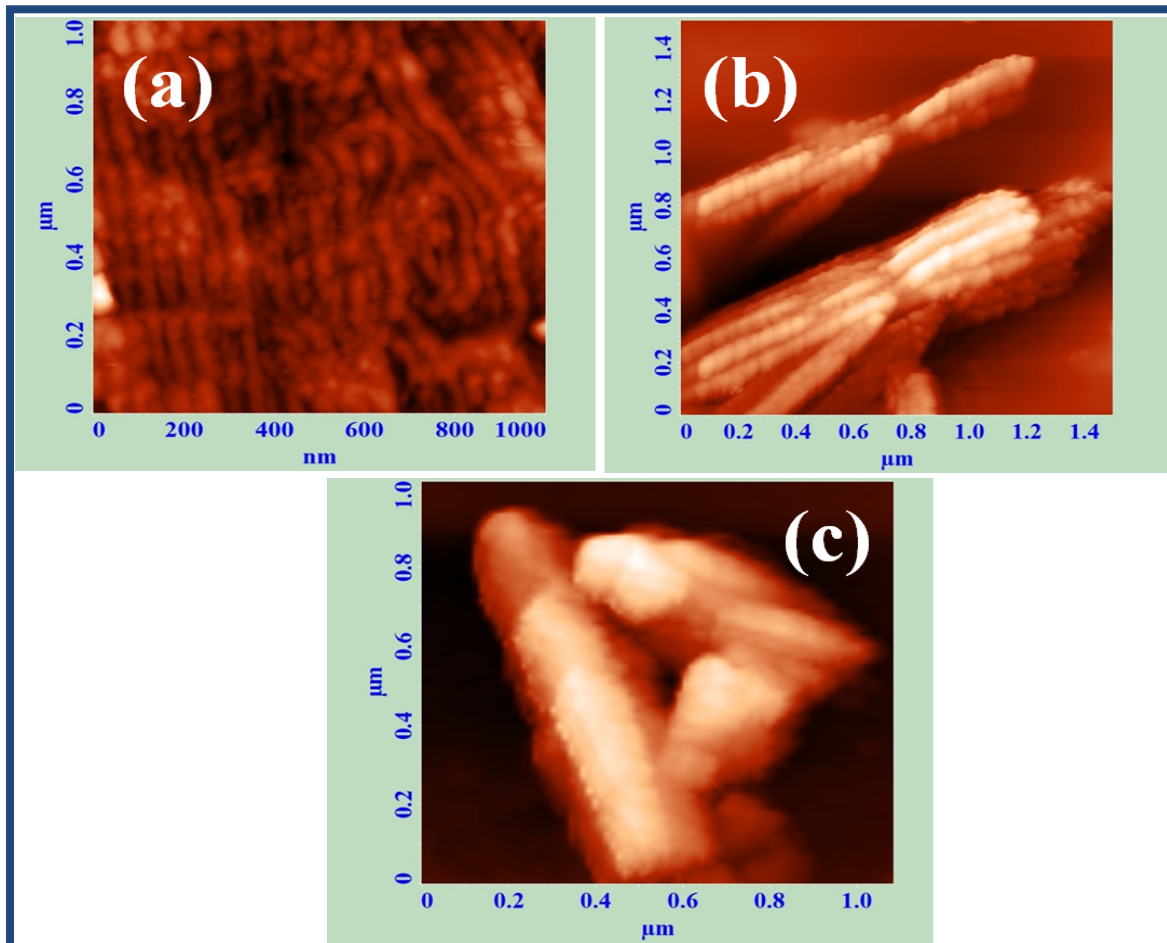

**Fig. S4** AFM images of SP2, SP5 and SP10

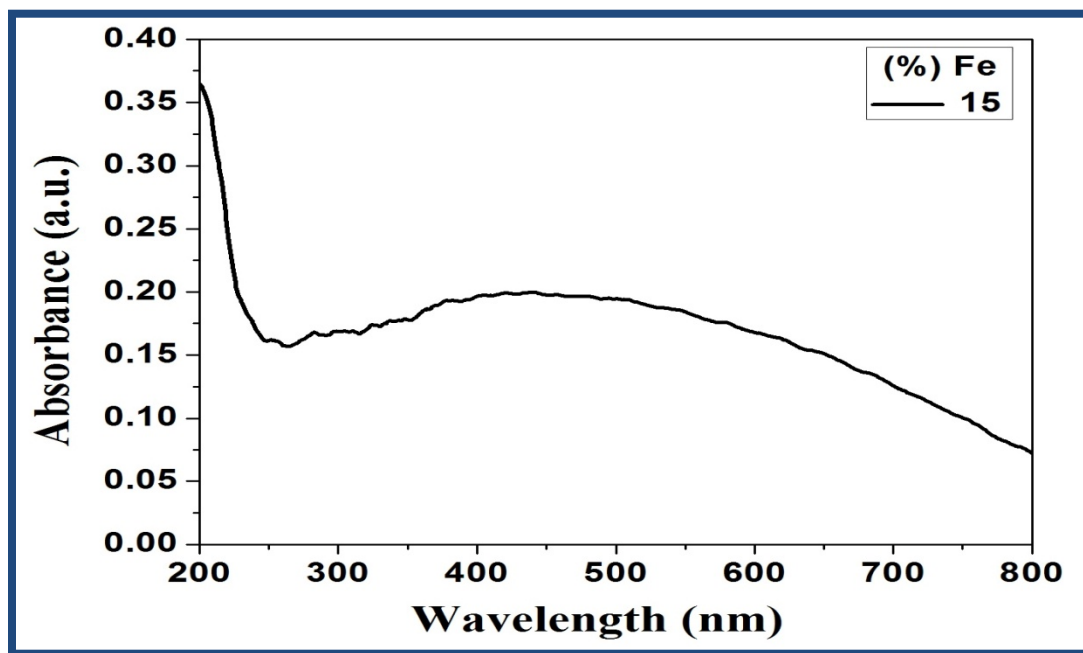

Fig. S5 UV-VIS spectrum of 15 % Fe doped sample

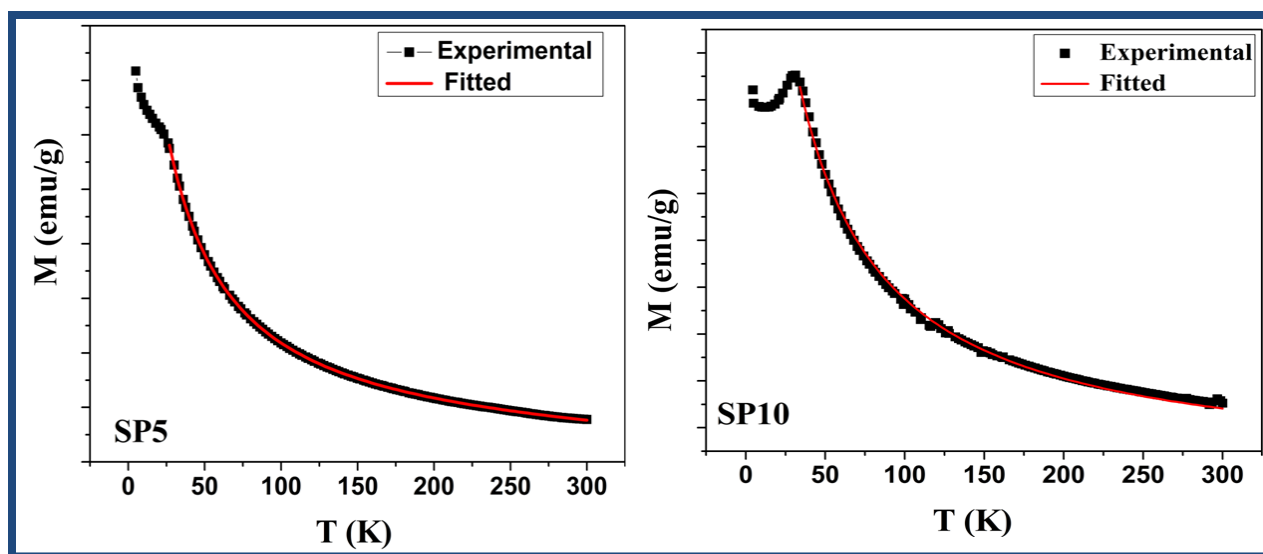

**Fig. S6** Fitted field cooled M-T plots for SP5 and SP10
